# Supplementary material for: Tracing G-Protein-Mediated Contraction and Relaxation in Vascular Smooth Muscle Cell Spheroids
Source: MDPI journal article supplement (doi:10.3390/cells12010128), 2022-12-28
Supplement: s1 [file s1]

**Figure S1**

**A**

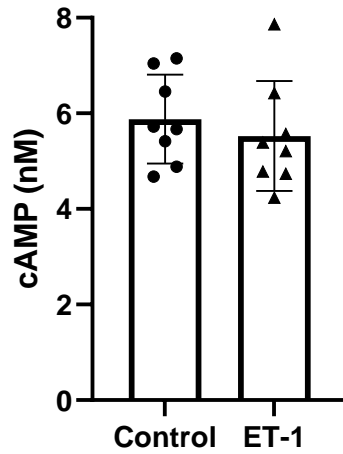

**B**

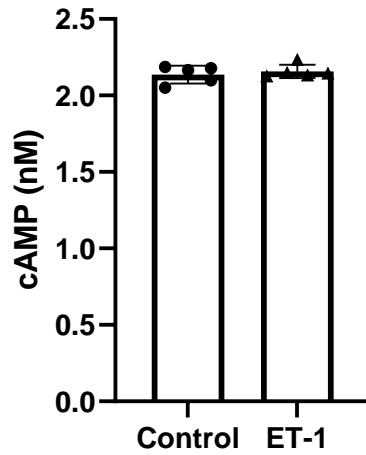

**Analysis of cAMP levels in murine aoSMCs cultured as monolayer (2D) or as spheroids (3D)**

The cAMP content was measured in 2D (A, n=8) or 3D aoSMC (B, n=5) treated with either solvent (control) or ET-1 (100 nM).

Figure S2

| Gene   | Name                       | log2 FC (3D vs. 2D) | adj. p-value | log2 FC (3D +TGFβ1 inh. vs. 3D) | adj. p-value |
|--------|----------------------------|---------------------|--------------|---------------------------------|--------------|
| ADRA1A | adrenoceptor alpha 1A      | 0.09                | >0.05        | -0.12                           | >0.05        |
| ADRA1B | adrenoceptor alpha 1B      | 0.09                | >0.05        | -0.08                           | >0.05        |
| ADRA1D | adrenoceptor alpha 1D      | -0.02               | >0.05        | 0.23                            | >0.05        |
| ADRA2A | adrenoceptor alpha 2A      | -0.23               | >0.05        | 0.05                            | >0.05        |
| ADRA2B | adrenoceptor alpha 2B      | 0.08                | >0.05        | 0.08                            | >0.05        |
| ADRA2C | adrenoceptor alpha 2C      | 0.34                | >0.05        | 0.03                            | >0.05        |
| ADRB1  | adrenoceptor beta 1        | -0.06               | >0.05        | -0.18                           | >0.05        |
| ADRB2  | adrenoceptor beta 2        | -0.13               | >0.05        | 0.02                            | >0.05        |
| ADRB3  | adrenoceptor beta 3        | 0.03                | >0.05        | -0.12                           | >0.05        |
| EDNRA  | endothelin receptor type A | 2.45                | 0.012        | -0.56                           | 0.017        |
| EDNRB  | endothelin receptor type B | 0.12                | >0.05        | 0.06                            | >0.05        |
| GNA11  | G protein subunit alpha 11 | -0.43               | 0.046        | 0.10                            | >0.05        |
| GNA12  | G protein subunit alpha 12 | 0.21                | >0.05        | -0.06                           | >0.05        |
| GNA13  | G protein subunit alpha 13 | 0.68                | 0.048        | -0.65                           | 0.008        |
| GNAI1  | G protein subunit alpha i1 | 0.33                | >0.05        | -0.43                           | >0.05        |
| GNAI2  | G protein subunit alpha i2 | -0.48               | 0.042        | -0.01                           | >0.05        |
| GNAI3  | G protein subunit alpha i3 | -0.45               | 0.049        | -0.02                           | >0.05        |
| GNAQ   | G protein subunit alpha q  | -0.21               | >0.05        | 0.10                            | >0.05        |
| GNAS   | GNAS complex locus         | 0.49                | 0.016        | -0.22                           | >0.05        |

RNA expression analyses of human VSMCs

(A) RNA was isolated from human umbilical artery smooth muscle cells (HUASMCs) cultured as 2D monolayer or 3D spheroids or 3D spheroids treated with the TGFRI/RII inhibitor LY2109761 were subjected to transcriptome analysis applying a whole genome microarray (n=3). The table summarizes the expression regulation of selected genes. (green: down-regulation, red: up-regulation, 3D vs 2D (left), 3D control vs 3D +LY2109761 (right)).

**Figure S3**

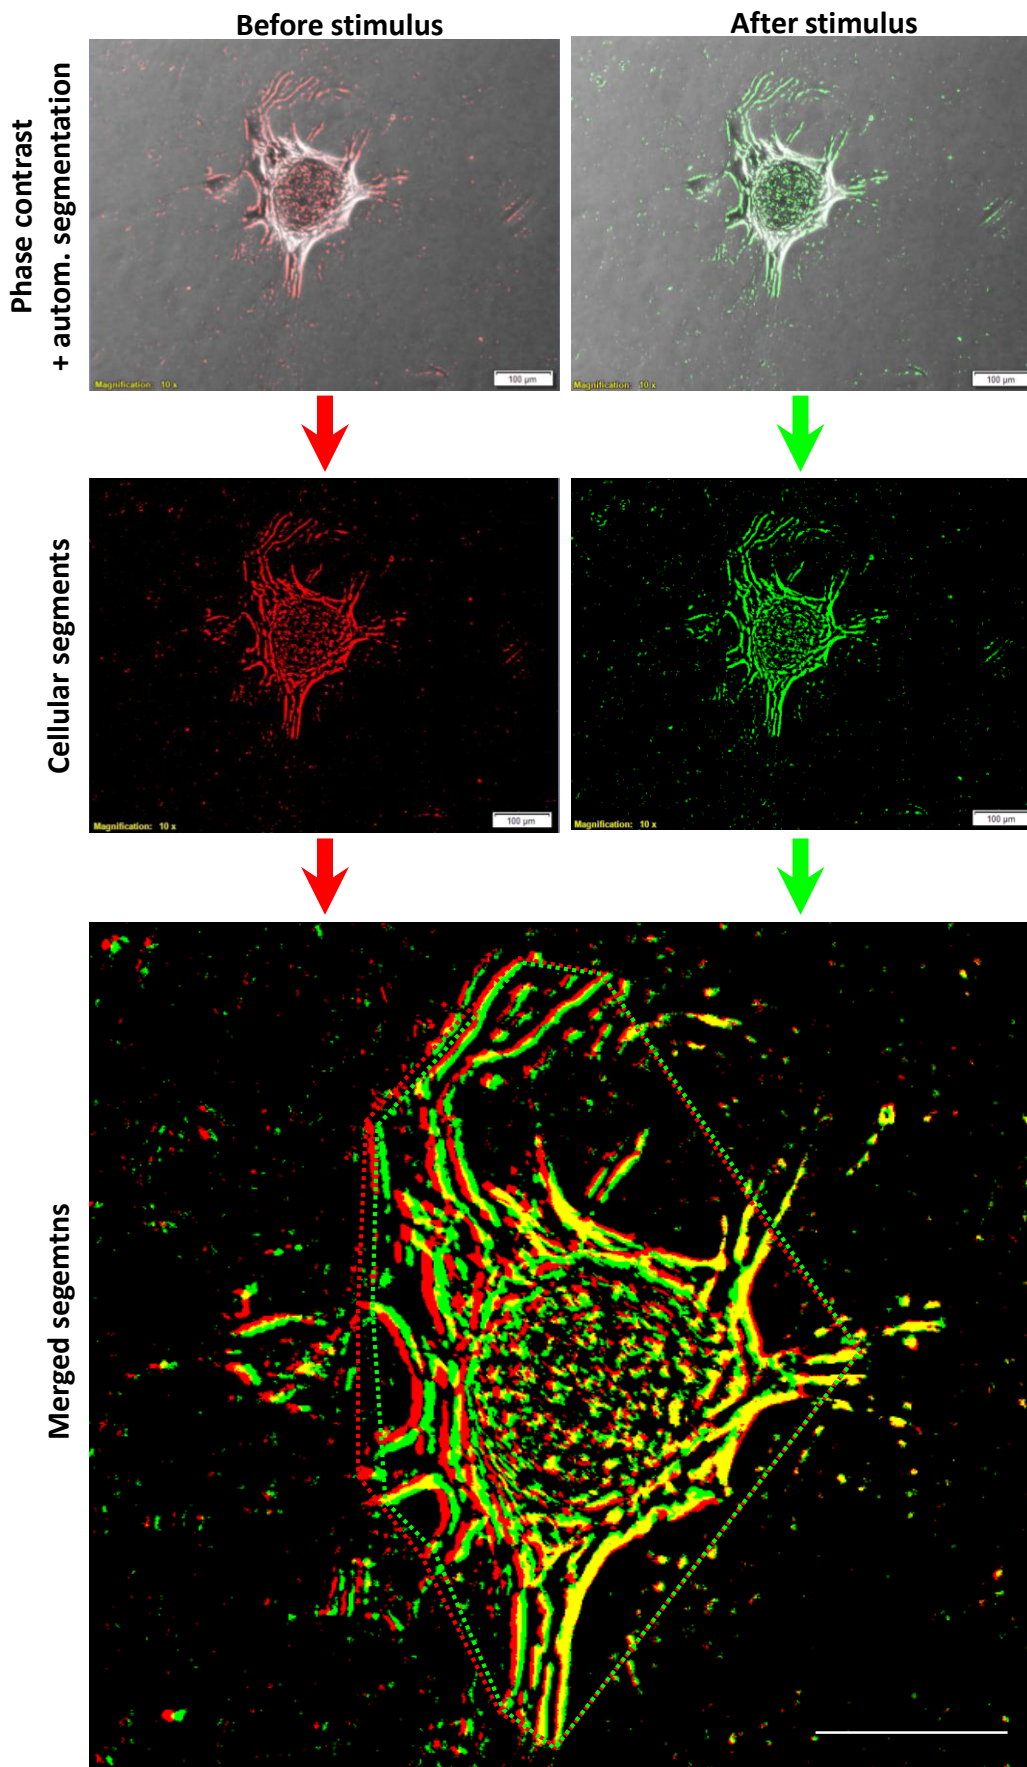

**Assessment of the contraction of a VSMC spheroid attached to a collagen gel**

Exemplary results showing a murine aoSMC spheroid attached to a collagen type I hydrogel before (red) and after (green) exposure to KCl. Cellular segments were detected by computer-aided morphometry of phase-contrast images. Cellular segments were isolated and merged. Area changes induced by contraction/relaxation were determined by overlaying both images and connecting segmental fix points defining the outer perimeter of attached VSMCs before and after the stimulus (scale bars: 100 μm).

**Figure S4**

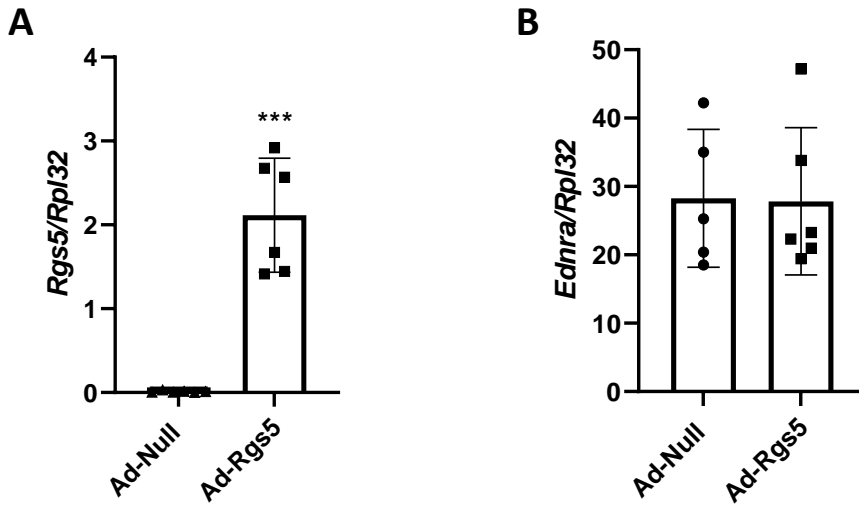

**Overexpression of *Rgs5* in murine VSMCs**

Murine aoSMC were transduced with adenoviral vectors carrying either empty vector (Ad-Null) or *Rgs5* (Ad-*Rgs5*). 3D spheroids were subsequently generated and the mRNA content of either *Rgs5* (A, n=6, \*\*\*p<0.001) or *Ednra* (B, n=5-6) was quantified by qPCR. *RPL32* was used as a reference.

Figure S5

|                                                  |   |                      |                  |                         |                     |                  |                  |                                                |                   |
|--------------------------------------------------|---|----------------------|------------------|-------------------------|---------------------|------------------|------------------|------------------------------------------------|-------------------|
| Each antibody is spotted in duplicate vertically |   | A                    | B                | C                       | D                   | E                | F                | G                                              | H                 |
|                                                  | 1 | POS                  | POS              | NEG                     | NEG                 | Akt<br>(P-S473)  | CREB<br>(P-S133) | ERK1<br>(P-T202/Y204)<br>ERK2<br>(P-Y185/Y187) | GSK3a<br>(P-S21)  |
|                                                  | 2 |                      |                  |                         |                     |                  |                  |                                                |                   |
|                                                  | 3 | GSK3b<br>(P-S9)      | HSP27<br>(P-S82) | JNK<br>(P-T183)         | MEK<br>(P-S217/221) | MKK3<br>(P-S189) | MKK6<br>(P-S207) | MSK2<br>(P-S360)                               | mTOR<br>(P-S2448) |
|                                                  | 4 |                      |                  |                         |                     |                  |                  |                                                |                   |
|                                                  | 5 | p38<br>(P-T180/Y182) | P53<br>(P-S15)   | P70S6K<br>(P-T421/S424) | RSK1<br>(P-S380)    | RSK2<br>(P-S386) | NEG              | NEG                                            | POS               |
|                                                  | 6 |                      |                  |                         |                     |                  |                  |                                                |                   |

Control

ET-1

Ad-Null

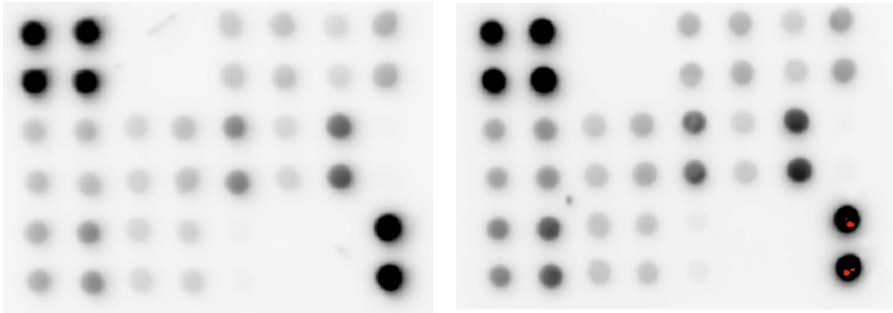

Ad-Rgs5

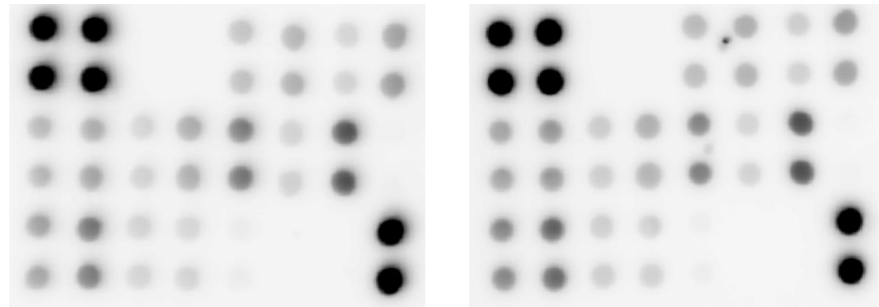

Representative array (Figure 4)

The phosphorylation level of multiple kinases was analyzed by an array (AAH-MAPK, RayBiotech) outlined as indicated in the table (phosphorylation sites in brackets). Each target is represented by two spots. The mean grey intensity of these spots was quantified using the Image Quant TL Software (GE Healthcare, Version 8.1). Representative arrays from control (Ad-Null) and *Rgs5* overexpressing (Ad-*Rgs5*) VSMCs treated with solvent (control) or ET-1 are shown below the table.
