# Supplementary material for: Tracing G-Protein-Mediated Contraction and Relaxation in Vascular Smooth Muscle Cell Spheroids
Source: Cells. 2022 Dec 28;12(1):128. doi: 10.3390/cells12010128 (PMC9818396; doi:10.3390/cells12010128)
Supplement: Supplementary file 1 [file cells-12-00128-s001.zip]

Archive with 4 entries (4 files):
- Movie S5-solvent control.avi
- Movie S6-KCl contraction.avi
- Movie S7-caffeine relaxation.avi
- Supplement - Garg et al-revised.pdf
